# Supplementary material
Source: PubMed Central journal article supplement (PMC7474609)
Supplement: pnas.1922330117.sapp.pdf [file pnas.1922330117.sapp.pdf]

2

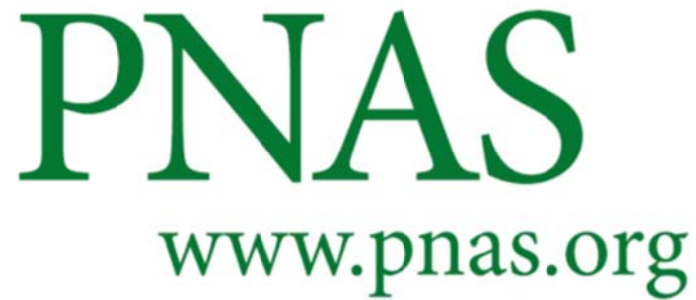

3

4 **Supplementary Information for**

5

6 **KAT5 acetylates cGAS to promote innate immune response to DNA virus**

7

8 Ze-Min Song, Heng Lin, Xue-Mei Yi, Wei Guo, Ming-Ming Hu, Hong-Bing Shu<sup>1,\*</sup>

9

10 Hong-Bing Shu

11 Email: shuh@whu.edu.cn

12

13 **This PDF file includes:**

14

15 SI Materials and Methods

16 Figures S1 to S5

17 Table S1

18

19

20

20 **Supplementary Information Text**

21

22 **SI Materials and Methods**

23

24 **Mice**

25 The *Kat5*<sup>SA/SA</sup> mice were kindly provided by Dr. Sheng-Cai Lin (Xiamen University)

26 (1). Genotyping by PCR was performed using the following primers. F1,

27 5'-GCCCCAGCCTCGGTTTTCCC-3'; R1, 5'-ACTGCCCTACGGGCTGACCC-3';

28 M1, 5'-TCAAGCTGATCCCCGCGCT-3'.

29 The mice were bred in specific pathogen-free facilities at Medical Research

30 Institute of Wuhan University. Six to eight week-old mice were used in the

31 experiments and age- and sex-matched mice were used as controls. Experiments were

32 conducted without blinding. All animal experiments were performed in accordance

33 with the Institutional Animal Care and Use Committee guidelines.

34

35 **Reagents, antibodies, cells and viruses**

36 2',3'-cGAMP and Lipofectamine 2000 (InvivoGen); polybrene (Millipore); SYBR

37 Green supermix (Bio-Rad); Dual-Specific Luciferase Assay Kit (Promega);

38 puromycin (Thermo); streptavidin agarose (Thermo); MG149 (Selleck); HDACs

39 inhibitor (TSA) and SIRT6 inhibitor (NAM) (MCE); 3xFLAG peptide, Ac-CoA and

40 Digitonin (Sigma); and ELISA kits for murine IFN- $\beta$  (PBL), IL-6 (BioLegend),

41 CXCL10 (BOSTER), and cGAMP (Cayman) were purchased for the indicated

42 manufacturers.

43 Mouse monoclonal antibodies against HA (901515) (BioLegend); FLAG (F3165)  
44 and  $\beta$ -actin (A2228) (Sigma); cGAS (31659S, 15102), phospho-MITA S366 (40818)  
45 and phospho-IRF3 S396 (4947S) (Cell Signaling Technology); phospho-TBK1 S172  
46 (ab109272), phospho-KAT5 S86 (ab73207), Ac-K (ab21623) and TBK1 (ab40676)  
47 (Abcam); KAT5 (sc-166363) and IRF3 (sc-33641) (Santa Cruz Biotechnology) were  
48 purchased from the indicated manufacturers.

49 The antibody that specifically recognizes acetylated 4K (K47/K56/K62/K83) of  
50 cGAS was raised by immunizing rabbits with a synthetic peptide:  
51 ALP(K-AC)AGKFGPAR(K-AC)SGSRQ(K-AC)KSAPDTQERPPVVRATGARAK(K-  
52 AC)APQR. The antibodies that specifically recognize acetylated cGAS(K384/K394)  
53 and cGAS(K414) were gifts from Dr. Tao Li (National Center of Biomedical Analysis  
54 of China) (2).

55 HEK293 and THP-1 cells were obtained from ATCC. HFFs were provided by Dr.  
56 Min-Hua Luo (Wuhan Institute of Virology, CAS). HSV-1 and MCMV were  
57 previously described (3).

58

### 59 **Establishment of stable KAT5-expressing or knockdown cells**

60 To establish KAT5-overexpressing cell lines, the 293 cells were transfected with two  
61 packaging plasmids (pGAG-Pol and pVSV-G) together with pMSCV-FLAG-KAT5  
62 retroviral plasmid or empty vector by calcium phosphate precipitation. To establish  
63 stable KAT5-knockdown cell lines, the 293 cells were transfected with two packaging

64 plasmids (pGAG-Pol and pVSV-G) together with control or KAT5-RNAi retroviral  
65 plasmid by calcium phosphate precipitation. Twenty-four hours after transfection,  
66 cells were incubated with new medium without antibiotics for another twenty-four  
67 hours. The recombinant virus-containing medium was collected and filtered with 0.4  
68  $\mu\text{m}$  filter (Millex) and then added into cultured THP-1 or HFF cells in the presence of  
69 polybrene (4  $\mu\text{g}/\text{mL}$ ). The infected cells were selected with puromycin (1  $\mu\text{g}/\text{mL}$ ) for  
70 48 hours before additional experiments were performed.

71

## 72 **Constructs**

73 Expression plasmids for HA- or FLAG-tagged KAT5 and its truncation mutants, HA-  
74 or FLAG-tagged cGAS and its truncation mutants, FLAG-tagged KAT5 (QG/EE),  
75 cGAS(K/R) and cGAS(K/Q) mutants were constructed by standard molecular biology  
76 techniques. The ISRE reporter plasmid and expression plasmids for MITA and TBK1  
77 were previously described (4, 5 ).

78

## 79 **Preparation of primary mouse cells**

80 The preparation of BMDMs and BMDCs was previously described (6). Briefly, for  
81 preparation of BMDMs, mouse bone marrow-derived monocytes ( $5 \times 10^6$ ) were  
82 cultured in 100 mm dishes in 5 mL 10% M-CSF-containing conditional medium from  
83 L929 cells for 3-5 days. For preparation of BMDCs, mouse bone marrow-derived  
84 monocytes ( $5 \times 10^6$ ) were cultured in medium containing murine GM-CSF (50 ng/mL)  
85 for 6-8 days.

86

87 **Synthetic dsDNA**

88 The sequences of synthetic dsDNA ISD45, HSV60, HSV120 and VAVC70 are as  
89 following.

90 ISD45: 5'-TACAGATCTACTAGTGATCTATGACTGATCTGTACATGATCT  
91 ACA-3';

92 HSV60: 5'-TAAGACACGATGCGATAAAATCTGTTTGTAAAATTTATTAAGGGT  
93 ACAAATTGCCCTAGC-3';

94 VACV70: 5'-CCATCAGAAAGAGGTTTAATATTTTTGTGAGACCATGGAAGA  
95 GAGAAAGAGATAAAAACTTTTTACGACT-3';

96 DNA90: 5'-TACAGATCTACTAGTGATCTATGACTGATCTGTACATGATCTAC  
97 ATACAGATCTACTAGTGATCTATGACTGATCTGTACATGATCTACA-3';

98 HSV120: 5'-AGACGGTATATTTTTGCGTTATCACTGTCCCGGATTGGACACGG  
99 TCTTGTGGGATAGGCATGCCCAGAAGGCATATTGGGTAAACCCTTTTTATT  
100 TGTGGCGGGTTTTTTGGAGGACTT-3'.

101

102 **Transfection and reporter assays**

103 Transfection and reporter assays were performed as previously described (7).

104 HEK293 cells were transfected by standard calcium phosphate precipitation method.

105 To ensure that each transfection receives the same amount of total DNA, an empty

106 control plasmid was added to each transfection. To normalize for transfection

107 efficiency, pRL-TK (*Renilla luciferase*) reporter plasmid (0.01 µg) was added to each

108 transfection. Luciferase assays were performed using a Dual-Specific Luciferase  
109 Assay Kit. Firefly luciferase activities were normalized with *Renilla* luciferase  
110 activities.

111

## 112 **RNAi**

113 Double-strand oligonucleotides corresponding to the target sequences were cloned  
114 into the pSuper.retro RNAi plasmid (Oligoengine). The target sequences are as  
115 following.

116 Human KAT5: #1, 5'-GGAGAAAGAATCAACGGAA-3'; #2,  
117 5'-GGCTGGACCTAAAGAAGAT-3'.

118

## 119 **qPCR**

120 Total RNAs were isolated and the reverse transcribed products were obtained for  
121 qPCR analysis to measure mRNA abundance of the indicated genes. Data shown is  
122 the relative abundance of the indicated mRNA normalized to that of GAPDH.

123 Gene-specific primer sequences were as following. Human *IFNB1*,

124 5'-TTGTTGAGAACCTCCTGGCT-3' and 5'-TGAATATGGTCCAGGCACAG-3';

125 human *ISG56*, 5'-TCATCAGGTCAAGGATAGTC-3' and

126 5'-CCACACTGTATTTGGTGTCTA-3'; human *CXCL10*,

127 5'-GGTGAGAAGAGATGTCTGAATCC-3' and

128 5'-GTCCATCCTTGGAAGCACTGCA-3'; human *IL6*,

129 5'-AGACAGCCACTCACCTCTTCAG-3' and

130 5'-TTCTGCCAGTGCCTCTTTGCTG-3'; human *GAPDH*,  
131 5'-GTCTCCTCTGACTTCAACAGCG-3' and  
132 5'-ACCACCCTGTTGCTGTAGCCAA-3'; human *KAT5*,  
133 5'-GGAACTCACCACATTGCCTGTC-3' and  
134 5'-CTCATTGCCTGGAGGATGTCGT-3'; murine *Ifnb1*,  
135 5'-TCCTGCTGTGCTTCTCCACCACA-3' and  
136 5'-AAGTCCGCCCTGTAGGTGAGGTT-3'; murine *Cxcl10*,  
137 5'-ATCATCCCTGCGAGCCTATCCT-3' and  
138 5'-GACCTTTTTTGGCTAAACGCTTTC-3'; murine *Isg56*,  
139 5'-TACAGGCTGGAGTGTGCTGAGA-3' and  
140 5'-CTCCACTTTCAGAGCCTTCGCA-3'; murine *Il6*,  
141 5'-TCTGCAAGAGACTTCCATCCAGTTGC-3' and  
142 5'-AGCCTCCGACTTGTGAAGTGGT-3'; murine *Gapdh*,  
143 5'-ACGGCCGCATCTTCTTGTGCA-3' and  
144 5'-ACGGCCAAATCCGTTTCACACC-3';

145

#### 146 **Viral plaque assays**

147 Viral plaque assays were previously described (8). Eight week-old mice were infected  
148 with HSV-1 for 5 days. The brains of mice were weighed and homogenized for 5  
149 seconds in PBS. After homogenization, the brain suspensions were centrifuged at  
150 1,620 g for 30 minutes, and the supernatants were used for plaque assays. Vero cells  
151 were seeded in 24-well plates, and the cells were infected by incubation for 2 hours at

152 37°C with serial dilutions of the brain suspensions. After infection for 2 hours, 2%  
153 methylcellulose was overlaid, and the plates were incubated for 36-48 hours. The  
154 overlay was removed, and cells were fixed with 4% paraformaldehyde for 20 minutes  
155 and stained with 1% crystal violet for 20 minutes before plaque counting.

156

#### 157 **ELISA**

158 BMDMs were infected with viruses or transfected with the synthetic DNAs for 18  
159 hours. The culture media were collected for measurement of IFN- $\beta$ , CXCL10 and  
160 IL-6. Eight week-old wild-type and *Kat5*<sup>SA/SA</sup> mice were infected intraperitoneally  
161 with HSV-1 and MCMV for 6 hours, and then the sera of mice were collected for  
162 measurement of IFN- $\beta$ , CXCL10 and IL-6 by ELISA.

163

#### 164 **Co-immunoprecipitation and immunoblotting analysis**

165 Cells were lysed in NP-40 lysis buffer (20 mM Tris-HCl pH7.4, 150 mM NaCl, 1 mM  
166 EDTA, 1% NP-40, 10  $\mu$ g/mL aprotinin, 10  $\mu$ g/mL leupeptin, and 1 mM  
167 phenylmethylsulfonyl fluoride). Co-immunoprecipitation and immunoblotting  
168 analysis were performed as previously described (9). To detect acetylated proteins,  
169 cells were treated with deacetylase inhibitors TSA and NAM for 8 hours before lysis.  
170 For immunoblots, the blocking buffer contains 50 mM Tris (pH 7.5), 10% (V/V)  
171 Tween-20 and 1% peptone, and incubation of the antibodies was carried out in 50 mM  
172 Tris (pH7.5) and 0.1% peptone.

173



174 **Recombinant protein purification**

175 The cDNAs of cGAS and its mutants were cloned into the pGEX-6p-1-GST. The  
176 cDNA of KAT5 was cloned into the pET-30C. The plasmids were transformed into  
177 the BL21 *E. Coli* strain. Expression of the recombinant proteins was induced with 0.1  
178 mM IPTG at 16°C for 24 hours. The recombinant GST-fusion proteins were purified  
179 with GST resins and eluted with elution buffer (PBS, 100 mM Tris-HCl pH 8.8, 40  
180 mM reduced glutathione). Ni<sup>2+</sup>-NTA-agarose was used for purification of His-tagged  
181 KAT5 protein. To prepare FLAG-KAT5 protein, a mammal expression plasmid for  
182 FLAG-KAT5 was transfected into HEK293 cells. The cells were lysed 18 hours after  
183 transfection. FLAG antibody-conjugated beads were then used for  
184 immunoprecipitation for 4 hours at 4°C. The beads were washed three times with lysis  
185 buffer. The FLAG-tagged KAT5 was eluted with 3xFLAG peptide in 250 mM  
186 Tris-HCl, pH 8.0. The FLAG-tagged KAT5 was used for acetylation assays *in vitro*.

187

188 ***In vitro* acetylation**

189 The recombinant GST-cGAS and FLAG-KAT5 were purified, and mixed in HAT  
190 buffer (250 mM Tris-HCl, pH 8.0, 50% (vol/vol) glycerol, 0.5 mM EDTA, and 5 mM  
191 DTT) with or without 1 mM Ac-CoA at 30°C for 1.5 hours. The reaction was  
192 terminated by SDS/PAGE sample buffer and the protein samples were subjected to  
193 immunoblotting analysis with anti-Ac-K mAb.

194

195 ***In vitro* pull-down assays**

196 *In vitro* pull-down assays were previously described (10). Briefly, HEK293 cells  
197 transfected with the indicated plasmids or THP-1 cells were lysed in NP-40 lysis  
198 buffer. Lysates were incubated with biotinylated-HSV120 for 1 hour at 4°C, and then  
199 incubated with streptavidin beads for another 3 hours at 4°C. The beads were washed  
200 three times with lysis buffer and analyzed by immunoblots with the indicated  
201 antibodies.

202

### 203 **Mass spectrometry**

204 HEK293 cells were transfected with FLAG-cGAS and HA-KAT5 plasmids for 20  
205 hours. The cells were then treated with the deacetylase inhibitors TSA and NAM for 8  
206 hours before lysis. The lysates were subjected to immunoprecipitation with  
207 anti-FLAG agarose beads at 4°C for 3 hours. The bound proteins were analyzed by  
208 MS, which was performed by SpecAlly (Wuhan) Life Science and Technology  
209 Company.

210

### 211 **Immunofluorescent microscopy**

212 HeLa or HT1080 cells were seeded on coverslips in 24-well plates. After transfection  
213 with HT-DNA for 5 hours or with the indicated plasmids for 20 hours, the cells were  
214 fixed with 4% paraformaldehyde for 15 minutes, permeabilized with 0.1% Triton  
215 X-100 for 10 minutes and blocked in 1% BSA for 1 hour. Cells were then incubated  
216 with a primary antibody for 2 hours, washed three times with washing buffer, and  
217 then incubated with Alexa Fluor 488-conjugated secondary antibody for 1 hour before

218 images were acquired using a ZEISS LSM confocal microscope.

219

### 220 **Microscale thermophoresis technology (MST)**

221 MST analysis was performed using a NanoTemper Monolith NT.115 instrument  
222 (NanoTemper Technologies GmbH). For detecting affinity, the protein samples were  
223 mixed with 20 nM Cy5-labeled HSV60. The samples were loaded into Premium  
224 Coated Capillaries and MST measurements were performed using 20% MST power  
225 and 40% LED power at 25°C. Laser-on and -off times were 30 and 5 seconds  
226 respectively. NanoTemper Analysis 1.2.20 software was used to fit the data and to  
227 determine the apparent K<sub>d</sub> values.

228

### 229 **cGAMP quantification**

230 BMDMs ( $1 \times 10^7$ ) were mock-infected or infected with HSV-1 for 2 hours. Cells were  
231 then homogenized by dounce homogenizer in hypotonic buffer (10 mM Tris-HCl [pH  
232 7.4], 10 mM KCl, and 1.5 mM MgCl<sub>2</sub>). After centrifugation at 13,000 rpm for 20 min,  
233 the supernatant was heated at 95°C for 10 min and centrifuged at 13,000 rpm for 10  
234 min to remove denatured proteins. cGAMP in the heat-resistant supernatants were  
235 measured by ELISA kit.

236 The indicated THP-1 cells ( $1 \times 10^8$ ) were left un-infected or infected with HSV-1  
237 (MOI=2) for 3 hours. Cells were then homogenized by dounce homogenizer in  
238 hypotonic buffer (10 mM Tris-HCl, pH 7.4, 10 mM KCl, 1.5 mM MgCl<sub>2</sub>). After  
239 centrifugation at 13,000 rpm for 20 minutes, the supernatant was heated at 95°C for

240 10 minutes and centrifuged at 13,000 rpm for another 10 minutes to remove denatured  
241 proteins. The heat-resistant supernatants containing cGAMP were delivered for  
242 cGAMP measurements with an Ultimate 3000 UHPLC Dionex (Sunnyvale, CA)  
243 coupled with a TSQ Quantiva (Thermo Fisher, Waltham, MA). The chromatography  
244 separation was performed on a Waters C18 column at 40°C. Selective reaction  
245 monitoring (SRM) and the appropriate product ions were chosen to quantify cGAMP.  
246 The ratio is based on the standard.

247

#### 248 **Digitonin permeabilization**

249 cGAMP (40 nM) was delivered to THP-1 cells pretreated with digitonin  
250 permeabilization solution (50 mM HEPES pH 7.0, 100 mM KCl, 3 mM MgCl<sub>2</sub>, 0.1  
251 mM DTT, 85 mM Sucrose, 0.2% BSA, 1 mM ATP, 0.1 mM GTP and 2 µg/mL  
252 digitonin) at 37°C for 20 minutes (11). Four hours later, the THP-1 cells were  
253 collected for qPCR analysis.

254

#### 255 **Statistics**

256 Unpaired Student's *t* test was used for statistical analysis of most experimental results  
257 in this study. For the mouse survival study, Kaplan-Meier survival curves were  
258 generated and analyzed by Log-Rank test. *P* < 0.05 was considered significant.

259

#### 260 **REFERENCES**

261 1. Li TY, *et al.* (2018) Tip60-mediated lipin 1 acetylation and ER translocation determine  
262 triacylglycerol synthesis rate. *Nature communications* 9(1):1916.

263 2. Dai J, *et al.* (2019) Acetylation Blocks cGAS Activity and Inhibits Self-DNA-Induced  
264 Autoimmunity. *Cell* 176(6):1447-1460 e1414.

265 3. Liu TT, *et al.* (2016) LSm14A Plays a Critical Role in Antiviral Immune Responses by  
266 Regulating MITA Level in a Cell-Specific Manner. *Journal of immunology*  
267 196(12):5101-5111.

268 4. Xu LG, *et al.* (2005) VISA is an adapter protein required for virus-triggered IFN-beta  
269 signaling. *Mol Cell* 19(6):727-740.

270 5. Zhong B, *et al.* (2008) The adaptor protein MITA links virus-sensing receptors to IRF3  
271 transcription factor activation. *Immunity* 29(4):538-550.

272 6. Luo WW, *et al.* (2016) iRhom2 is essential for innate immunity to DNA viruses by mediating  
273 trafficking and stability of the adaptor STING. *Nature immunology* 17(9):1057-1066.

274 7. Fu YZ, *et al.* (2017) Human Cytomegalovirus Tegument Protein UL82 Inhibits  
275 STING-Mediated Signaling to Evade Antiviral Immunity. *Cell host & microbe* 21(2):231-243.

276 8. Hu MM, Liao CY, Yang Q, Xie XQ, & Shu HB (2017) Innate immunity to RNA virus is  
277 regulated by temporal and reversible sumoylation of RIG-I and MDA5. *The Journal of*  
278 *experimental medicine* 214(4):973-989.

279 9. Zhong B, *et al.* (2010) The E3 ubiquitin ligase RNF5 targets virus-induced signaling adaptor  
280 for ubiquitination and degradation. *Journal of immunology* 184(11):6249-6255.

281 10. Lian H, *et al.* (2018) ZCCHC3 is a co-sensor of cGAS for dsDNA recognition in innate  
282 immune response. *Nature communications* 9(1):3349.

283 11. Hu MM, *et al.* (2016) Sumoylation Promotes the Stability of the DNA Sensor cGAS and the  
284 Adaptor STING to Regulate the Kinetics of Response to DNA Virus. *Immunity* 45(3):555-569.

285  
286  
287  
288  
289  
290  
291  
292  
293  
294  
295  
296  
297  
298  
299  
300  
301  
302  
303  
304  
305  
306

307

308

309 **Table S1 MS analysis of acetylation sites at the N-terminus of cGAS**

| Protein Accession | Peptide                                                         | Acetylation site | m/z          | PTM                                                      |
|-------------------|-----------------------------------------------------------------|------------------|--------------|----------------------------------------------------------|
| Q8N884 CGAS_HUMAN | R.Q(-17.03)K(+42.01)KSA<br>PDTQERPPVR.A                         | 62               | 587.9<br>814 | Pyro-glu (Q);<br>Acetylation (K)                         |
| Q8N884 CGAS_HUMAN | R.AK(+42.01)KAPQRAQ<br>DTQPSDATSAPGAEGLE<br>PPAAR.E             | 82               | 1053.<br>523 | Acetylation (K)                                          |
| Q8N884 CGAS_HUMAN | A.PEAALPKAGK(+42.01)<br>FGPAR.K                                 | 50               | 776.4<br>293 | Acetylation (K)                                          |
| Q8N884 CGAS_HUMAN | E.SPAAPEAALPKAGK(+<br>42.01)FGPAR.K                             | 50               | 939.5<br>099 | Acetylation (K)                                          |
| Q8N884 CGAS_HUMAN | R.GAP(+31.99)MDPTESP<br>AAPEAALPK(+42.01).A                     | 47               | 641.9<br>72  | Dihydroxy (P);<br>Acetylation (K)                        |
| Q8N884 CGAS_HUMAN | R.G(+43.01)APMDPTESP<br>AAPEAALPK(+42.01).A                     | 47               | 967.9<br>744 | Carbamylation (G);<br>Acetylation (K)                    |
| Q8N884 CGAS_HUMAN | R.ASEAGATAPK(+42.01)<br>ASAR.N                                  | 21               | 665.3<br>377 | Acetylation (K)                                          |
| Q8N884 CGAS_HUMAN | R.ASEAGATAPK(+42.01)<br>ASAR(+14.02).N                          | 21               | 672.3<br>414 | Acetylation (K);<br>Methylation(KR)                      |
| Q8N884 CGAS_HUMAN | R.Q(-17.03)KK(+42.01)SA<br>PDTQERPPVR.A                         | 63               | 587.9<br>794 | Pyro-glu (Q);<br>Acetylation (K)                         |
| Q8N884 CGAS_HUMAN | K.K(+43.01)(+42.01)SAP<br>DTQERPPVR.A                           | 63               | 783.3<br>968 | Carbamylation (K);<br>Acetylation (K)                    |
| Q8N884 CGAS_HUMAN | K.K(+42.01)(+14.02)APQ(+<br>.98)RAQDTQPSDATSA<br>PGAEGLEPPAAR.E | 83               | 992.1<br>501 | Acetylation (K);<br>Methylation(KR);<br>Deamidation (NQ) |

310

Figure S1

A

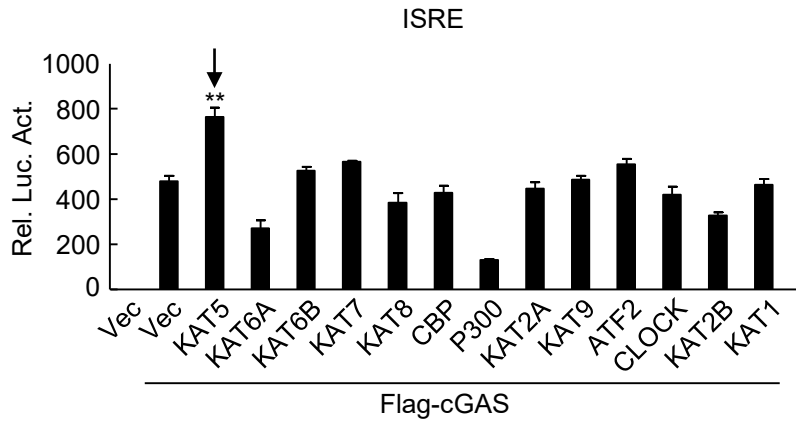

B

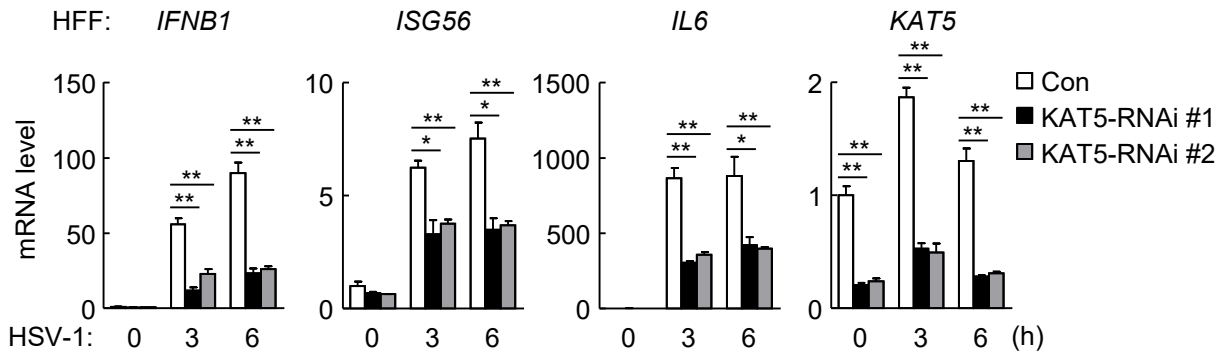

C

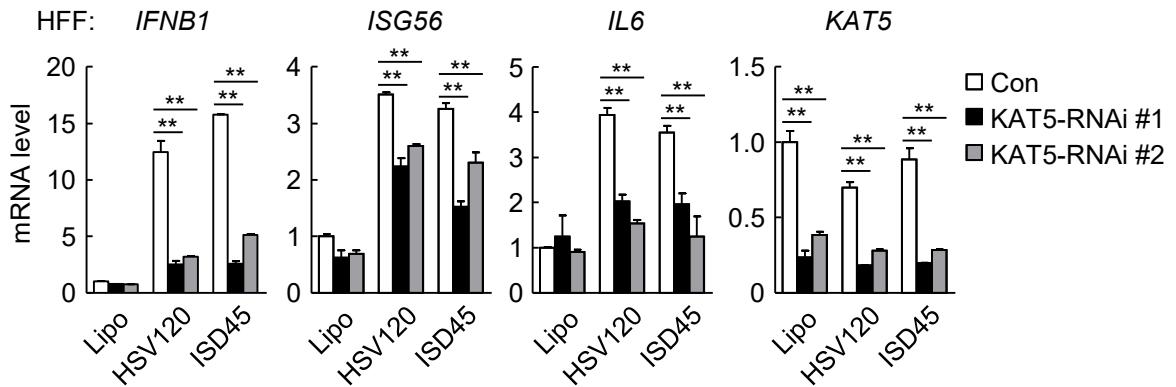

D

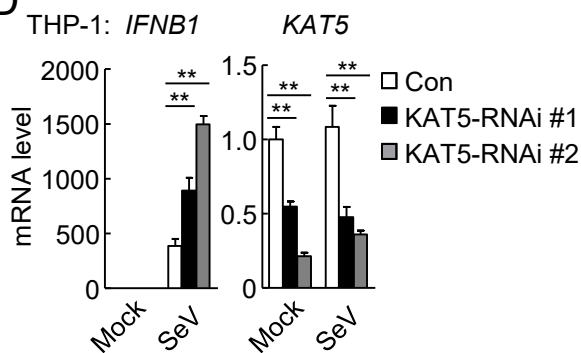

E

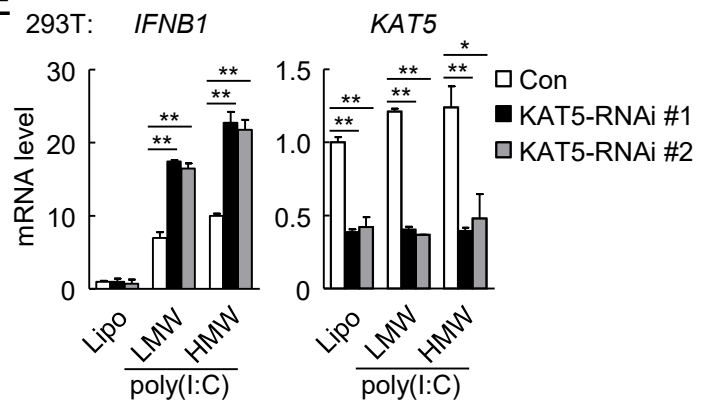

**Figure S1. KAT5 positively regulates HSV-1-induced transcription of downstream genes.**

- A. Screens of the acetyltransferase family members for their ability to regulate cGAS-mediated ISRE activation. HEK293 cells stably-expressing MITA were transfected with the indicated plasmids together with ISRE reporter plasmid for 20 hours before luciferase assays.
- B. Effects of KAT5 knockdown on HSV-1-induced transcription of downstream genes in HFFs. The control and KAT5-knockdown HFFs were infected with HSV-1 for the indicated times before qPCR analysis of the indicated genes.
- C. Effects of KAT5 knockdown on dsDNA-induced transcription of downstream genes in HFFs. The control and KAT5-knockdown HFFs were transfected with dsDNA for the indicated times before qPCR analysis of the indicated genes.
- D. Effects of KAT5 knockdown on SeV-induced transcription of *IFNB1* gene. The control and KAT5-knockdown THP-1 cells were infected with SeV for 8 hours before qPCR analysis.
- E. Effects of KAT5 knockdown on transfected poly(I:C)-induced transcription of *IFNB1* gene. The control and KAT5-knockdown HEK293 cells were transfected with poly(I:C) for 8 hours before qPCR analysis. LMW, low molecular weight; HMV, high molecular weight.

\*  $P < 0.05$ , \*\*  $P < 0.01$  (unpaired  $t$  test). Data shown are mean  $\pm$  SD from one representative experiments performed in triplicate.



Figure S2

A

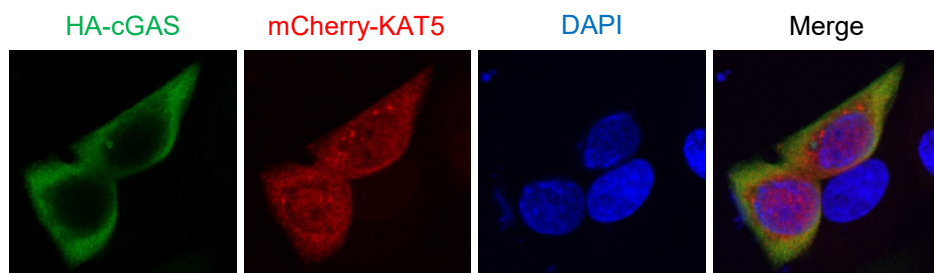

B

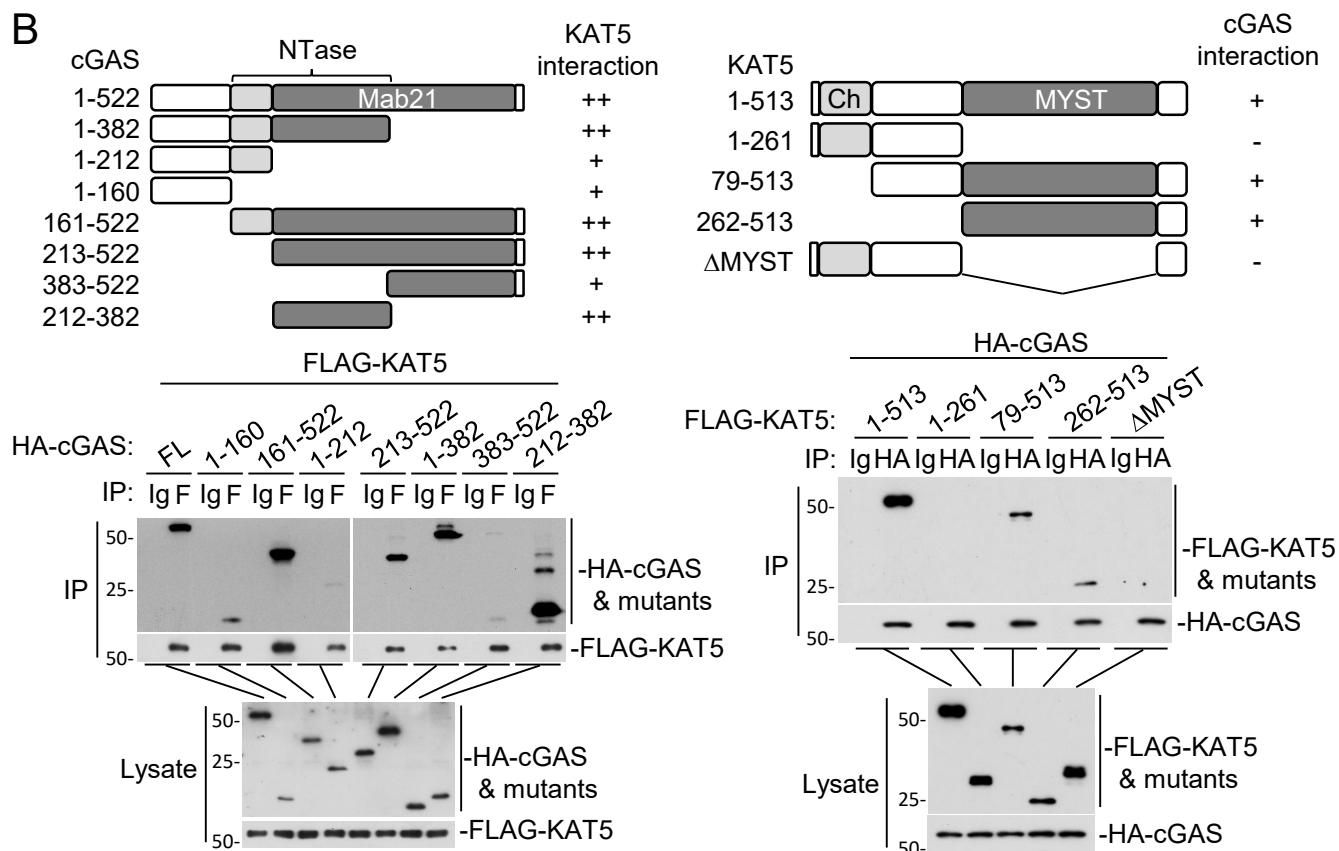

C

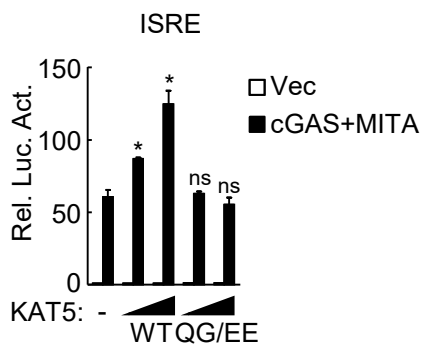

D

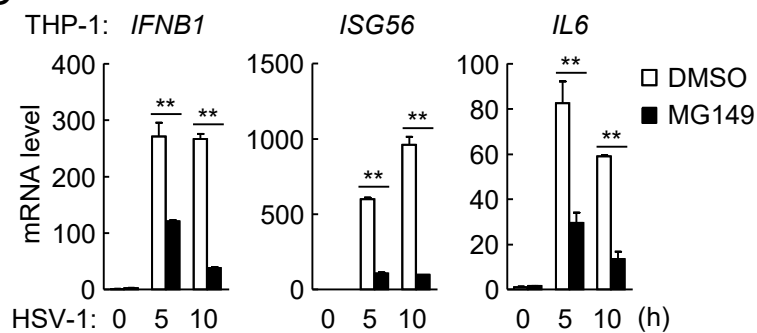

**Figure S2. KAT5 plays a role in innate immune response to DNA virus by targeting cGAS.**

- A. cGAS and KAT5 partially colocalized in the cytoplasm. HeLa cells were transfected with the indicated plasmids for 20 hours before immunofluorescent analysis.
- B. Domain mapping of the interaction between KAT5 and cGAS. HEK293 cells were transfected with the indicated plasmids for 20 hours before coimmunoprecipitation and immunoblotting analysis with the indicated antibodies.
- C. Effects of KAT5 and KAT5(QG/EE) on cGAS-mediated ISRE activation. HEK293 cells were transfected with the indicated plasmids for 20 hours before luciferase assays were performed. ns, no significance. \*  $P < 0.05$  (unpaired  $t$  test). Data shown are mean  $\pm$  SD from one representative experiments performed in triplicate.
- D. Effects of KAT5 acetyltransferase inhibitor MG149 on HSV-1-induced transcription of downstream genes. THP1 cells were treated with MG149, then were left un-infected or infected with HSV-1 (MOI=1) for the indicated times before qPCR analysis of the indicated genes. \*\*  $P < 0.01$  (unpaired  $t$  test). Data shown are mean  $\pm$  SD from one representative experiments performed in triplicate.

A

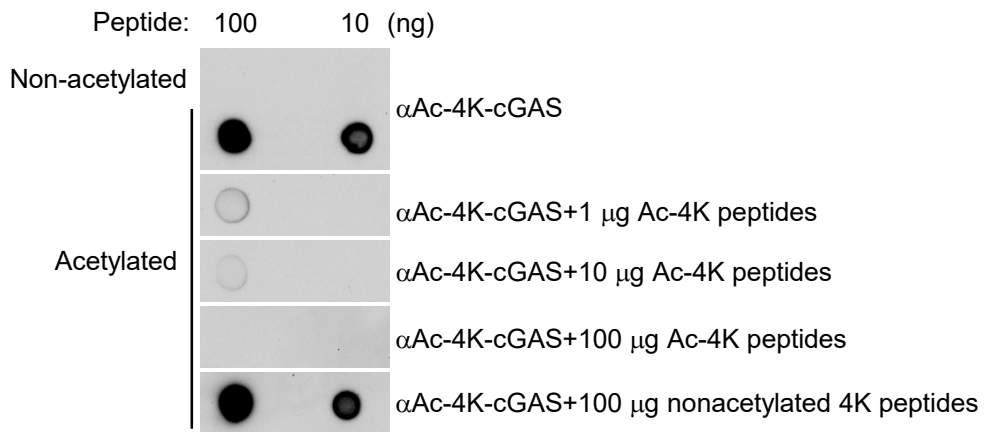

B

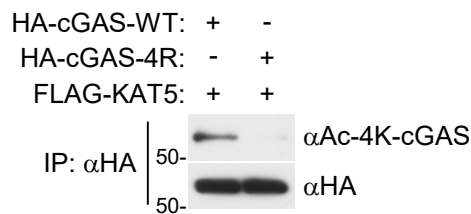

C

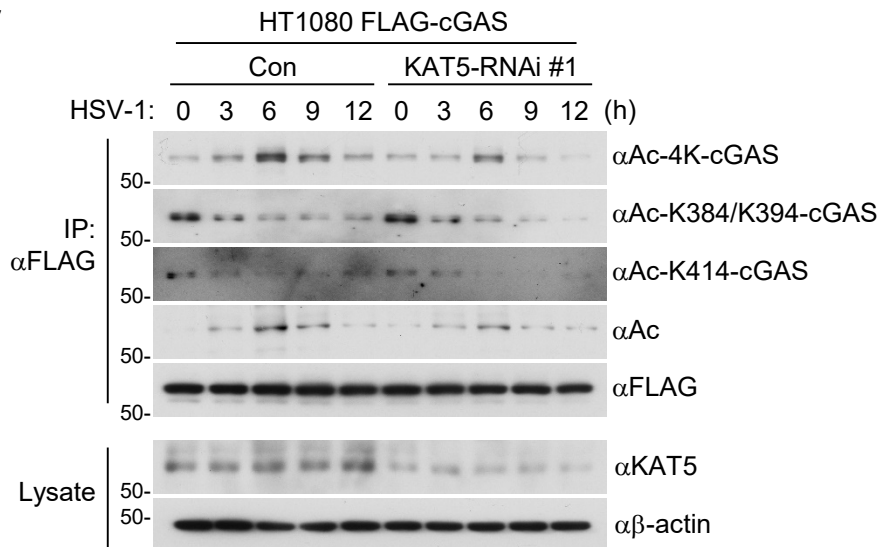

**Figure S3. KAT5 catalyzes cGAS acetylation.**

- A. Dot blotting analysis of acetylated and non-acetylated 4K peptides with anti-Ac-4K-cGAS antibody without or with the indicated peptide competitors.
- B. HEK293 cells were transfected with the indicated plasmids for 20 hours before coimmunoprecipitation and immunoblotting analysis with the indicated antibodies.
- C. Effects of KAT5 knockdown on HSV-1-induced acetylation of cGAS. The KAT5-knockdown and control HT1080-FLAG-cGAS cell lines were infected with HSV-1 (MOI=2) for the indicated times before coimmunoprecipitation and immunoblotting analysis with the indicated antibodies.

Figure S4

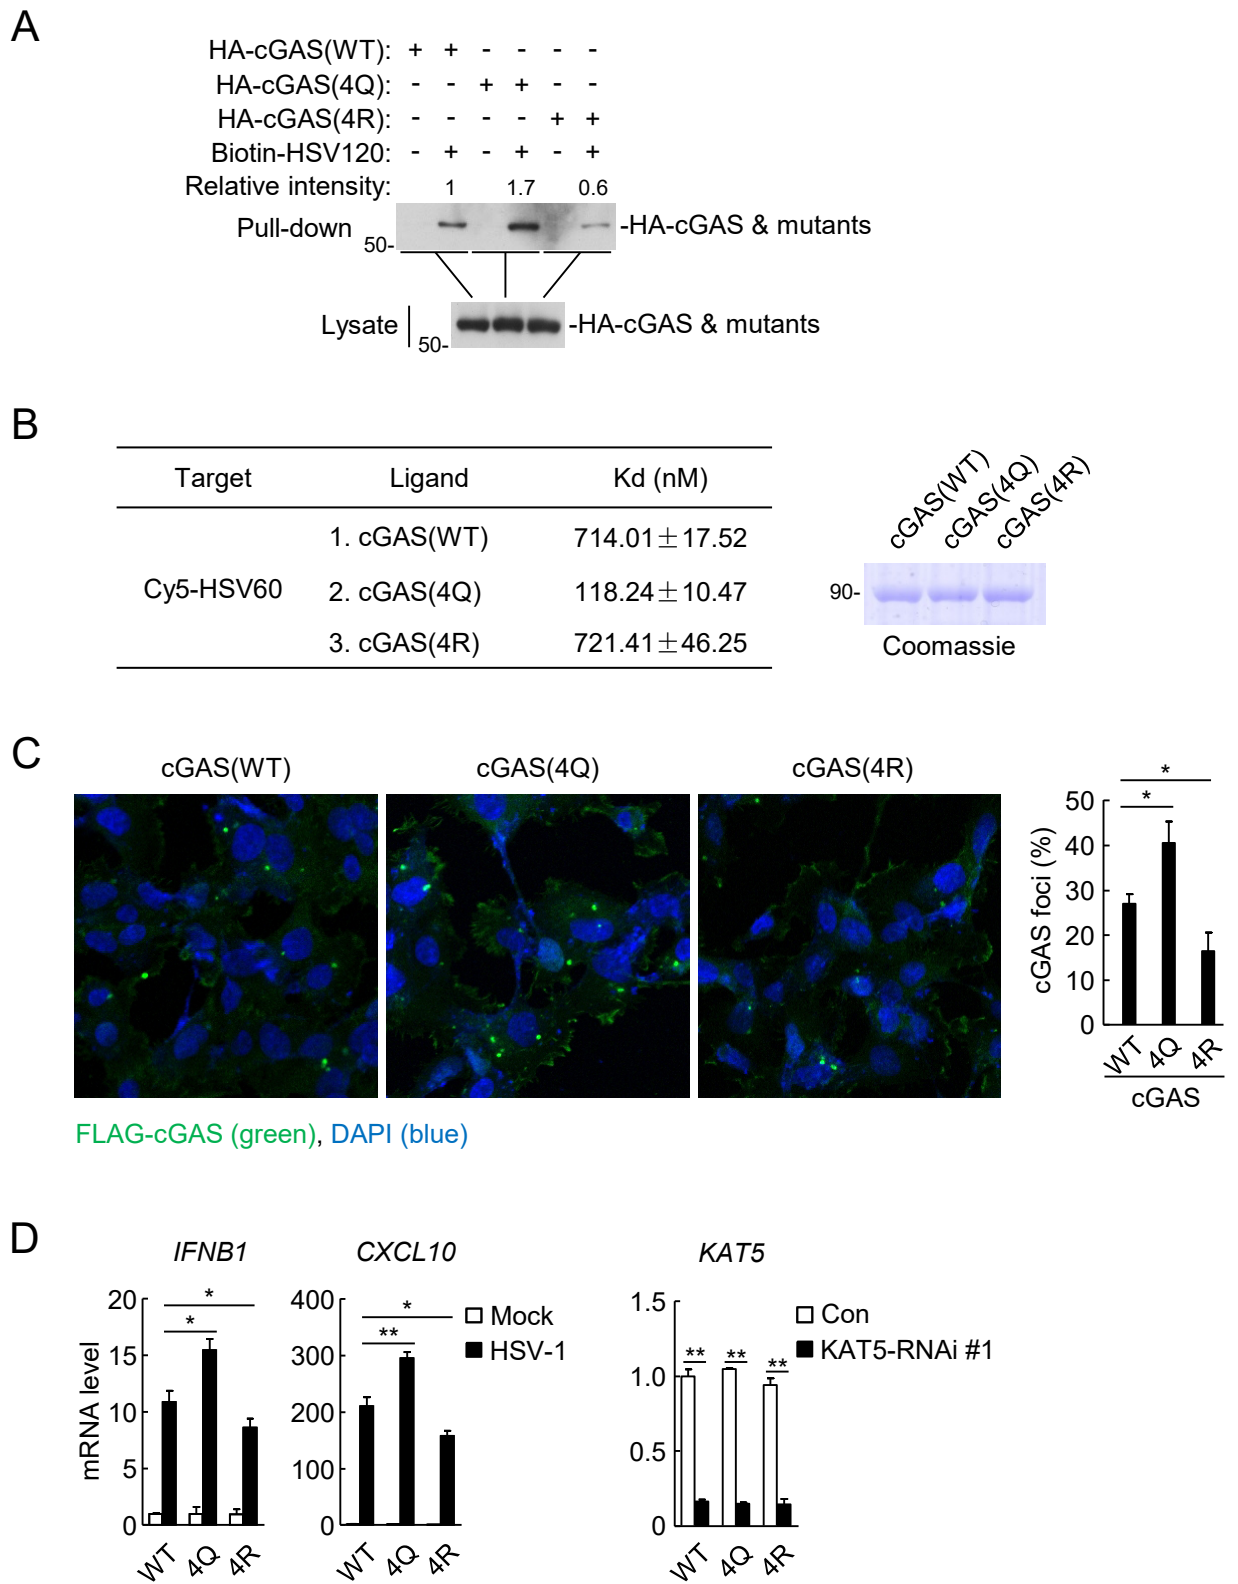

**Figure S4. Acetylation of cGAS by KAT5 increases its activity.**

- A. Binding of dsDNA by wild-type cGAS, cGAS(4Q) and cGAS(4R). HEK293 cells were transfected with the indicated plasmids for 20 hours. The cell lysates were then incubated with biotinylated-HSV120 and streptavidin-sepharose beads. The bead-bound proteins were analyzed by immunoblots with the indicated antibodies.
- B. Binding affinities of wild-type cGAS, cGAS(4Q) and cGAS(4R) to dsDNA. Recombinant GST-cGAS, GST-cGAS(4Q) and GST-cGAS(4R) were purified *from E. Coli.*, and then mixed with Cy5-labeled HSV60 before MST measurements. The purified recombinant proteins were stained with Coomassie blue (right gel).
- C. Foci formation of wild-type cGAS, cGAS(4Q) and cGAS(4R). The HT1080 cells expressing wild-type cGAS, cGAS(4Q) or cGAS(4R) were transfected with HT-DNA for 5 hours before immunofluorescent staining (left panels). Cells with or without foci in three viewing fields were counted (right histogram). \*  $P < 0.05$  (unpaired  $t$  test).
- D. Effects of cGAS and its mutants on HSV-1-induced transcription of downstream genes in KAT5-RNAi knockdown cells. The HT1080 cells expressing wild-type cGAS, cGAS(4Q) or cGAS(4R) were transduced with KAT5-RNAi retroviruses. The cells were infected with HSV-1 for 9 hours or left un-infected before qPCR analysis. \*  $P < 0.05$ , \*\*  $P < 0.01$  (unpaired  $t$  test). Data shown are mean  $\pm$  SD from one representative experiment performed in triplicates.

Figure S5

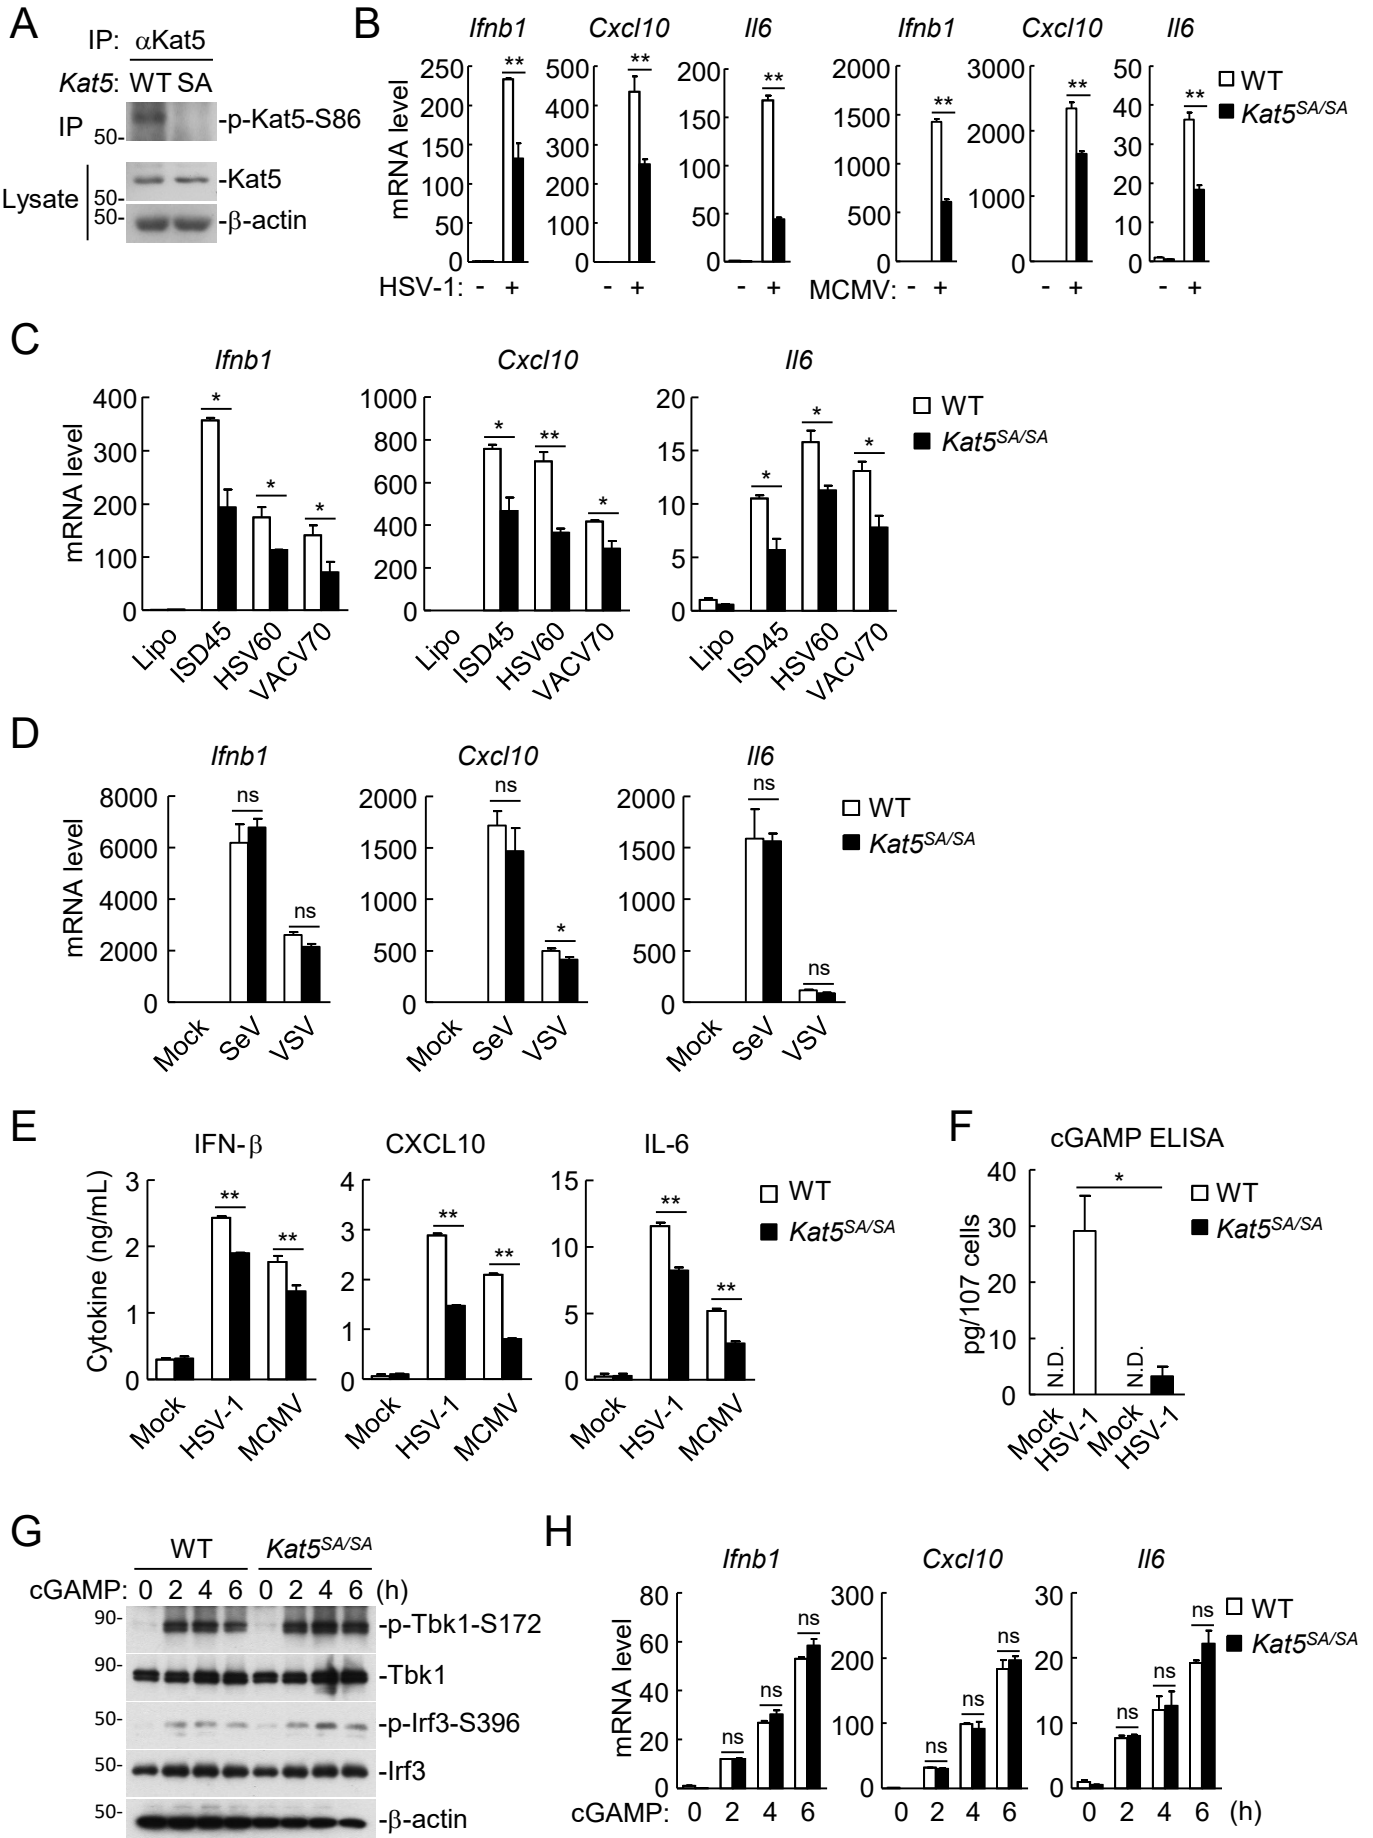

**Figure S5. Inhibition of DNA-triggered innate immune response in *Kat5<sup>SA/SA</sup>* mice.**

- A. *Kat5*-S86 was not phosphorylated in *Kat5<sup>SA/SA</sup>* BMDCs. Cell lysates from wild-type or *Kat5<sup>SA/SA</sup>* BMDCs were immunoprecipitated with anti-KAT5, and the immunoprecipitates and lysates were analyzed by immunoblots with the indicated antibodies.
- B. Inhibition of DNA virus-induced transcription of downstream antiviral genes in *Kat5<sup>SA/SA</sup>* BMDCs. Wild-type and *Kat5<sup>SA/SA</sup>* BMDCs were left uninfected or infected with HSV-1 or MCMV for 6 hours before qPCR analysis.
- C. Inhibition of transfected DNA-induced transcription of downstream antiviral genes in *Kat5<sup>SA/SA</sup>* BMDCs. Wild-type and *Kat5<sup>SA/SA</sup>* BMDCs were transfected with the indicated dsDNA for 4 hours before qPCR analysis.
- D. RNA virus-induced transcription of downstream antiviral genes was comparable in wild-type and *Kat5<sup>SA/SA</sup>* BMDMs. Wild-type and *Kat5<sup>SA/SA</sup>* BMDMs were left uninfected or infected with SeV or VSV for 6 hours before qPCR analysis.
- E. Inhibition of DNA virus-induced production of IFN- $\beta$ , CXCL10 and IL-6 in *Kat5<sup>SA/SA</sup>* BMDMs. Wild-type and *Kat5<sup>SA/SA</sup>* BMDMs were left un-infected or infected with HSV-1 or MCMV for 18 hours before ELISA analysis.
- F. Inhibition of HSV-1-induced cGAMP production in *Kat5<sup>SA/SA</sup>* BMDMs. Wild-type and *Kat5<sup>SA/SA</sup>* BMDMs were left un-infected or infected with HSV-1 for 2 hours before ELISA analysis. N.D., not detectable.
- G. cGAMP-induced phosphorylation of Tbk1-S172 and Irf3-S396 were comparable in wild-type and *Kat5<sup>SA/SA</sup>* BMDMs. BMDMs were left untreated or treated with 2'3'-cGAMP (40 nM) for the indicated times before immunoblotting analysis with the indicated antibodies.
- H. cGAMP-induced transcription of downstream antiviral genes were comparable in Wild-type and *Kat5<sup>SA/SA</sup>* BMDMs. BMDMs were left untreated or treated with 2'3'-cGAMP (40 nM) for the indicated times before qPCR analysis.

Data shown are mean  $\pm$  SD from one representative experiments performed in duplicate (F) or triplicate (B-E, H). ns, no significance. \*  $P < 0.05$ , \*\*  $P < 0.01$  (unpaired  $t$  test).
